# Supplementary material
Source: PubMed Central journal article supplement (PMC4486677)
Supplement: EC.00010-15_zek999094436so1.pdf [file EC.00010-15_zek999094436so1.pdf]

A

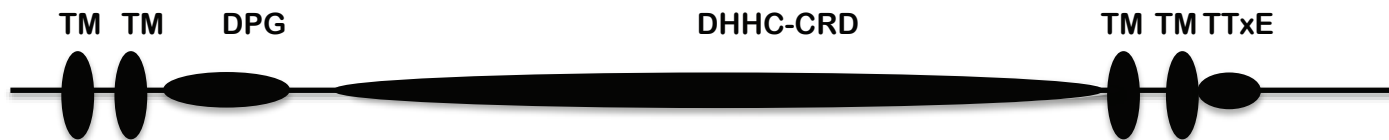

B

|                 | <u>DPG</u> | <u>DHHC - CRD</u>                                      | <u>TTxE</u> |
|-----------------|------------|--------------------------------------------------------|-------------|
| CNAG_00436 Cpt1 | TDPGF      | NFCIVCMARKPLRSKHCRTCNRFCVARFDHHC PWIWN CVGAKNHR SFLLFV | MTTFEV      |
| CNAG_02481 Cpt2 | VPPGF      | RRCRKCDGPKPERTHHCSICKRCVLMMDHHC PWINNCVGLHNQRHFVLFM    | ETSIES      |
| CNAG_04849 Cpt3 | PDPAN      | RWCRFCEIVKPDRTHHCRHCGTCVMQFDHHC LWIGQCVGWANHKFFIIFN    | RTTVES      |
| CNAG_03891 Cpt4 | TSPGT      | RYCKNCAHYKPPRAHHCRCCKTCWLKLDHHC PWIGNCVGFYNQGHFIRFL    | STTIEG      |
| CNAG_00274 Cpt5 | PDPPM      | KYCETCETYRPPRC SHCRLCGNCVDGIDHHC SYLHTCVGKRNYFSFIVLL   | ITTLEQ      |
| CNAG_06862 Cpt6 | RSPGS      | RWCKQCNAWKPDRTHHCRHCHRCVLMMDHHC PWVGT CVGYRNYKPFLLFI   | MTTLES      |
| CNAG_04167 Cpt7 | YDPPL      | YKGRCGGRWKPARTRHCTQCGVC RAGFDHHC PFFANCLTAPYIPTFLAVL   |             |

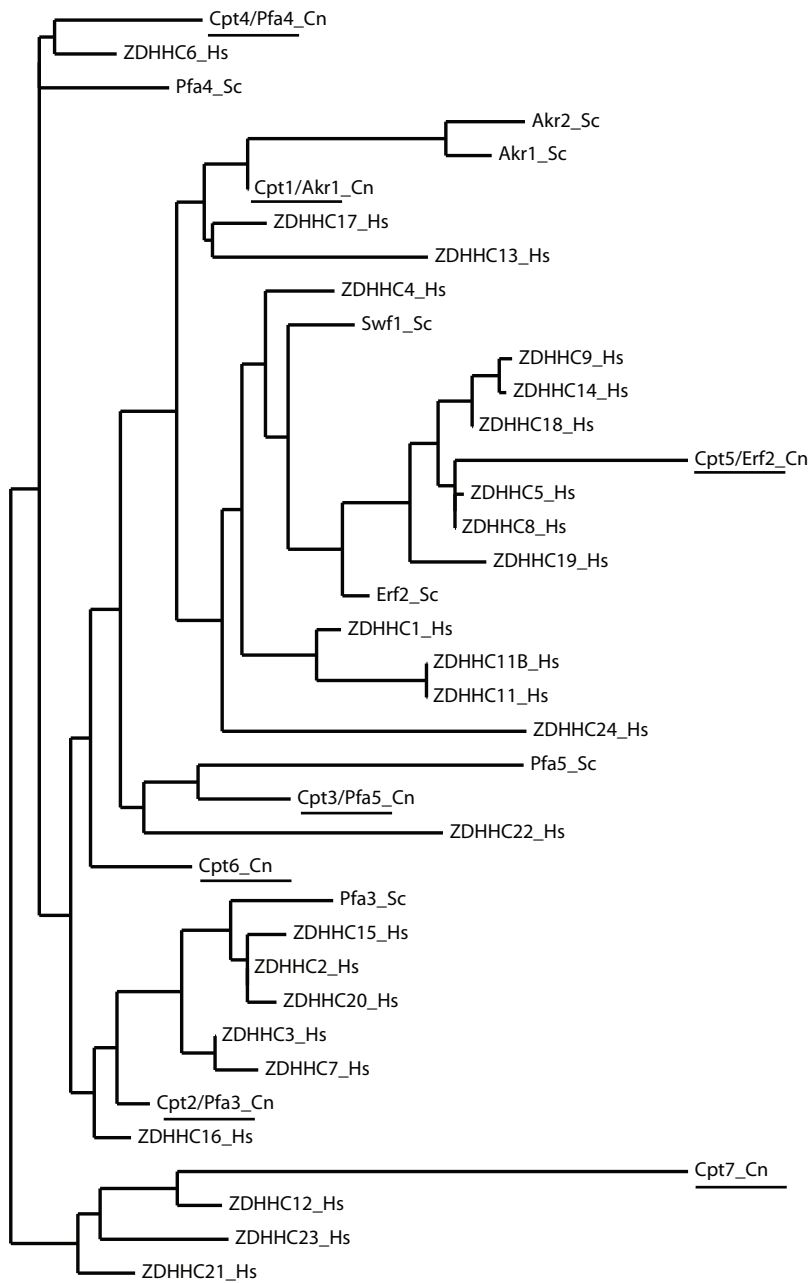

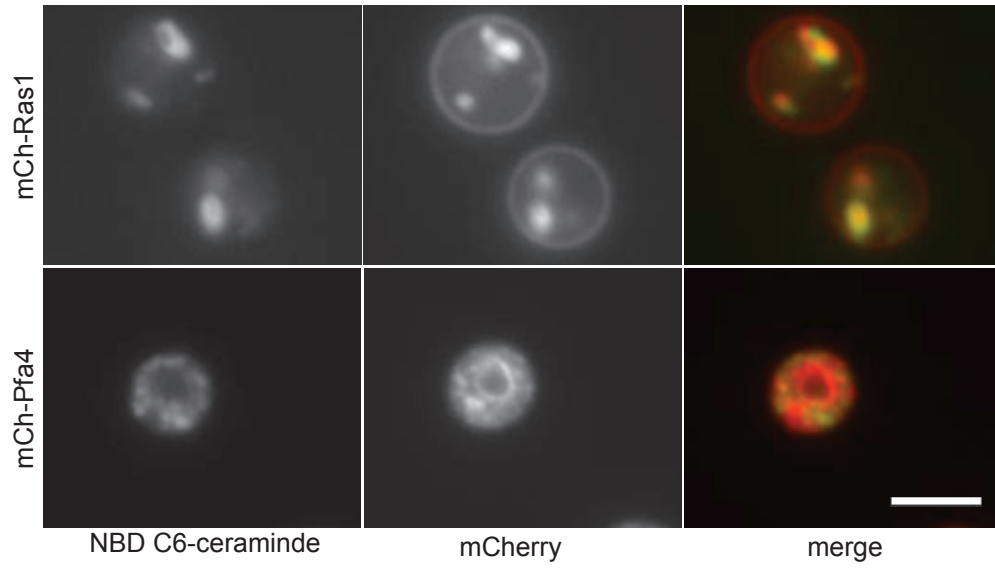

**Supplementary Figure 1.** Conserved domains in *C. neoformans* putative PAT genes. (A). Diagram of conserved PAT domains. The DHHC-CRD domain is flanked by TM (transmembrane) domains, a DPG domain, and a TTxE domain. (B). Alignment of *C. neoformans* conserved PAT domains.

**Supplementary Figure 2.** Phylogeny tree of *C. neoformans*, *S. cerevisiae*, and *H. sapiens* PATs. Protein sequence alignment (MUSCLE) and tree phylogeny (PhyML) was constructed using Phylogeny.fr. Tree was drawn using TreeDyn.

**Supplementary Figure 3.** Golgi localization of *C. neoformans* mCh-Ras1 and mCh-Pfa4. Wild type cells expressing mCh-Ras1 (CBN116) and mCh-Pfa4 (CBN451) were fixed in 3.7% formaldehyde then incubated with the green-emission fluorescent Golgi marker NBD C6-Ceramide to compare Golgi localization to mCh-Ras1 (top panels) and mCh-Pfa4 (bottom panels). Images (x100) were taken at the using the appropriate filter and merged. Bar, 5  $\mu\text{m}$ .
